# Supplementary material
Source: MDPI journal article supplement (https://www.mdpi.com/2071-1050/14/5/2860)
Supplement: s1 [file s1]

Archive with 2 entries (2 files):
- CONSORT 2010 Checklist.pdf
- sustainability-1534200supplement.pdf
